# Supplementary material
Source: publisher site journal article supplement (https://e-cmh.org/upload/media/cmh-2023-0121-Supplementary-8.pdf)
Supplement: Supplementary file 1 [file cmh-2023-0121-Supplementary-8.pdf]

**Appendix 8.** Discrimination of risk predicting models in complete-case analysis or using cirrhosis at initiation of AVT in calculation of on-treatment scores

**Supplementary Table 8-1.** Discrimination of risk predicting models in complete-case analysis

| MODEL                                                  | Year 2.5         | Year 3           | Year 3.5         | Year 4           | Year 4.5         | Year 5           |
|--------------------------------------------------------|------------------|------------------|------------------|------------------|------------------|------------------|
| Untreated models without the cirrhosis variable        |                  |                  |                  |                  |                  |                  |
| REACH-B                                                | 0.58 (0.46,0.70) | 0.61 (0.46,0.76) | 0.56 (0.34,0.79) | 0.55 (0.42,0.68) | 0.56 (0.35,0.77) | 0.56 (0.30,0.82) |
| NGM1-HCC                                               | 0.62 (0.48,0.75) | 0.65 (0.48,0.81) | 0.55 (0.33,0.77) | 0.55 (0.42,0.67) | 0.54 (0.37,0.71) | 0.54 (0.28,0.81) |
| NGM2-HCC                                               | 0.57 (0.43,0.70) | 0.63 (0.47,0.79) | 0.52 (0.28,0.75) | 0.53 (0.42,0.65) | 0.55 (0.42,0.69) | 0.53 (0.27,0.79) |
| Untreated models with the cirrhosis variable           |                  |                  |                  |                  |                  |                  |
| GAG-HCC                                                | 0.69 (0.60,0.77) | 0.67 (0.57,0.76) | 0.72 (0.64,0.79) | 0.71 (0.64,0.78) | 0.67 (0.57,0.76) | 0.69 (0.53,0.85) |
| Treated or mixed models without the cirrhosis variable |                  |                  |                  |                  |                  |                  |
| mREACH-BI                                              | 0.64 (0.52,0.76) | 0.69 (0.54,0.84) | 0.58 (0.37,0.79) | 0.64 (0.54,0.74) | 0.61 (0.36,0.86) | 0.58 (0.37,0.78) |
| mREACH-BII                                             | 0.66 (0.54,0.79) | 0.68 (0.53,0.83) | 0.58 (0.38,0.78) | 0.67 (0.58,0.76) | 0.66 (0.46,0.87) | 0.58 (0.39,0.77) |
| LSM-HCC                                                | 0.69 (0.58,0.81) | 0.64 (0.51,0.77) | 0.61 (0.49,0.73) | 0.68 (0.56,0.80) | 0.64 (0.51,0.77) | 0.61 (0.47,0.74) |
| SAGE-B                                                 | 0.74 (0.65,0.82) | 0.63 (0.51,0.76) | 0.64 (0.54,0.75) | 0.71 (0.61,0.81) | 0.56 (0.42,0.70) | 0.57 (0.43,0.70) |
| mPAGE-B                                                | 0.68 (0.59,0.77) | 0.64 (0.54,0.74) | 0.64 (0.55,0.73) | 0.65 (0.56,0.75) | 0.63 (0.51,0.75) | 0.62 (0.47,0.77) |
| PAGE-B                                                 | 0.66 (0.57,0.75) | 0.63 (0.54,0.73) | 0.64 (0.55,0.73) | 0.64 (0.52,0.75) | 0.66 (0.53,0.79) | 0.65 (0.49,0.82) |
| aMAP                                                   | 0.69 (0.59,0.79) | 0.66 (0.55,0.77) | 0.64 (0.54,0.73) | 0.68 (0.58,0.78) | 0.65 (0.53,0.78) | 0.65 (0.49,0.82) |
| Treated or mixed models with the cirrhosis variable    |                  |                  |                  |                  |                  |                  |
| AASL-HCC                                               | 0.71 (0.61,0.80) | 0.68 (0.59,0.77) | 0.72 (0.64,0.79) | 0.71 (0.63,0.78) | 0.66 (0.56,0.77) | 0.67 (0.51,0.84) |
| CAMD                                                   | 0.69 (0.60,0.78) | 0.67 (0.58,0.77) | 0.71 (0.63,0.79) | 0.69 (0.61,0.77) | 0.65 (0.54,0.75) | 0.69 (0.53,0.84) |
| REAL-B                                                 | 0.71 (0.62,0.80) | 0.69 (0.59,0.78) | 0.71 (0.62,0.80) | 0.72 (0.63,0.81) | 0.70 (0.60,0.80) | 0.68 (0.51,0.85) |
| CU-HCC                                                 | 0.66 (0.56,0.77) | 0.64 (0.52,0.75) | 0.70 (0.62,0.78) | 0.71 (0.61,0.80) | 0.65 (0.54,0.76) | 0.72 (0.57,0.87) |
| RWS-HCC                                                | 0.73 (0.64,0.82) | 0.72 (0.62,0.82) | 0.75 (0.66,0.83) | 0.78 (0.73,0.84) | 0.75 (0.64,0.86) | 0.65 (0.47,0.82) |
| CAGE-B                                                 | 0.75 (0.68,0.83) | 0.67 (0.55,0.78) | 0.69 (0.60,0.78) | 0.74 (0.67,0.82) | 0.60 (0.49,0.71) | 0.57 (0.47,0.68) |

**Supplementary Table 8-2.** Discrimination of risk predicting models using cirrhosis at initiation of antiviral treatment in calculation of on-treatment scores

| MODEL    | Year 2.5 (n=660) | Year 3 (n=640)   | Year 3.5 (n=622) | Year 4 (n=603)   | Year 4.5 (n=589) | Year 5 (n=562)   |
|----------|------------------|------------------|------------------|------------------|------------------|------------------|
| GAG-HCC  | 0.68 (0.60,0.76) | 0.68 (0.59,0.76) | 0.70 (0.62,0.77) | 0.71 (0.63,0.78) | 0.64 (0.55,0.72) | 0.64 (0.51,0.76) |
| AASL-HCC | 0.70 (0.61,0.77) | 0.69 (0.59,0.78) | 0.69 (0.61,0.76) | 0.70 (0.62,0.77) | 0.63 (0.54,0.71) | 0.62 (0.49,0.73) |
| CAMD     | 0.69 (0.61,0.76) | 0.69 (0.60,0.78) | 0.70 (0.61,0.78) | 0.71 (0.62,0.78) | 0.63 (0.54,0.71) | 0.58 (0.47,0.68) |
| REAL-B   | 0.71 (0.63,0.78) | 0.69 (0.59,0.77) | 0.69 (0.60,0.77) | 0.73 (0.64,0.81) | 0.66 (0.57,0.74) | 0.67 (0.53,0.78) |
| CU-HCC   | 0.66 (0.57,0.73) | 0.66 (0.56,0.75) | 0.66 (0.58,0.74) | 0.70 (0.61,0.78) | 0.63 (0.54,0.71) | 0.65 (0.52,0.76) |
| RWS-HCC  | 0.71 (0.62,0.80) | 0.70 (0.60,0.79) | 0.71 (0.62,0.79) | 0.77 (0.68,0.84) | 0.74 (0.62,0.83) | 0.65 (0.49,0.78) |
